# Supplementary material for: Calibration and analysis of the uncertainty in downscaling global land use and land cover projections from GCAM using Demeter (v1.0.0)
Source: Copernicus journal article supplement (doi:10.5194/gmd-12-1753-2019), 2019-05-03
Supplement: Supplementary file 1 [file gmd-12-1753-2019-supplement.pdf]

Supplement of Geosci. Model Dev., 12, 1753–1764, 2019  
<https://doi.org/10.5194/gmd-12-1753-2019-supplement>  
© Author(s) 2019. This work is distributed under  
the Creative Commons Attribution 4.0 License.

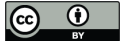

*Supplement of*

## **Calibration and analysis of the uncertainty in downscaling global land use and land cover projections from GCAM using Demeter (v1.0.0)**

**Min Chen et al.**

*Correspondence to:* Min Chen ([min.chen@pnnl.gov](mailto:min.chen@pnnl.gov))

The copyright of individual parts of the supplement might differ from the CC BY 4.0 License.

13 Table S1. Conversion table from CCI-LC product groups to Final Land Types (FLTs).

| <b>CCI-LC groups</b>                       | <b>FLTs</b> |
|--------------------------------------------|-------------|
| no_data                                    | No data     |
| cropland_rainfed                           | Crop        |
| cropland_rainfed_herbaceous_cover          | Crop        |
| cropland_rainfed_tree_or_shrub_cover       | Crop        |
| cropland_irrigated                         | Crop        |
| mosaic_cropland                            | Crop        |
| mosaic_natural_vegetation                  | Crop        |
| tree_broadleaved_evergreen_closed_to_open  | Forest      |
| tree_broadleaved_deciduous_closed_to_open  | Forest      |
| tree_broadleaved_deciduous_closed          | Forest      |
| tree_broadleaved_deciduous_open            | Forest      |
| tree_needleleaved_evergreen_closed_to_open | Forest      |
| tree_needleleaved_evergreen_closed         | Forest      |
| tree_needleleaved_evergreen_open           | Forest      |
| tree_needleleaved_deciduous_closed_to_open | Forest      |
| tree_needleleaved_deciduous_closed         | Forest      |
| tree_needleleaved_deciduous_open           | Forest      |
| tree_mixed                                 | Forest      |
| mosaic_tree_and_shrub                      | Forest      |
| mosaic_herbaceous                          | Grass       |
| shrubland                                  | Shrub       |
| shrubland_evergreen                        | Shrub       |
| shrubland_deciduous                        | Shrub       |
| grassland                                  | Grass       |
| lichens_and_mosses                         | Grass       |
| sparse_vegetation                          | Sparse      |
| sparse_shrub                               | Sparse      |
| sparse_herbaceous                          | Sparse      |
| tree_cover_flooded_fresh_or_brakish_water  | Sparse      |
| tree_cover_flooded_saline_water            | Forest      |
| shrub_or_herbaceous_cover_flooded          | Shrub       |
| urban                                      | Urban       |
| bare_areas                                 | Sparse      |
| bare_areas_consolidated                    | Sparse      |
| bare_areas_unconsolidated                  | Sparse      |
| water                                      | No data     |
| snow_and_ice                               | Snow        |

15 Figure S1. An overview illustration of the key processes in Demeter.

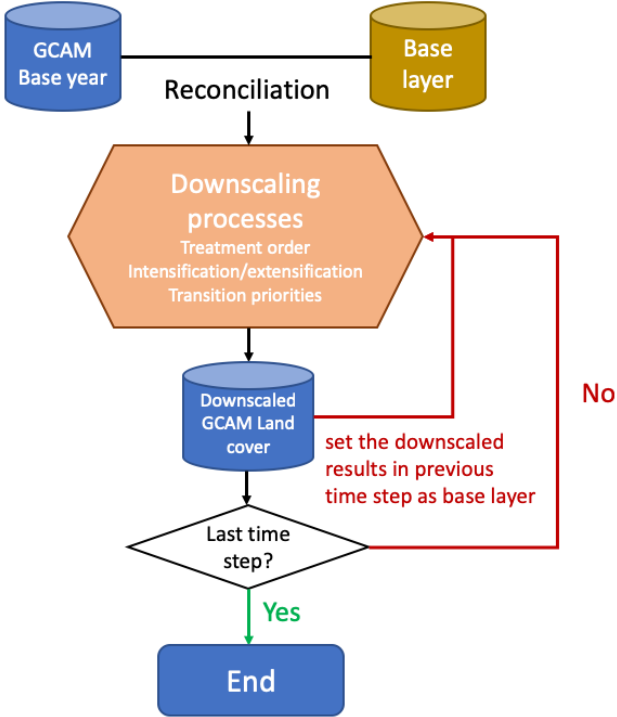

16

17 Figure S2. Spatial pattern of the observed and downscaled Forest density (measured by  
18 percentage fraction of the grid cell), and their differences in 2015.

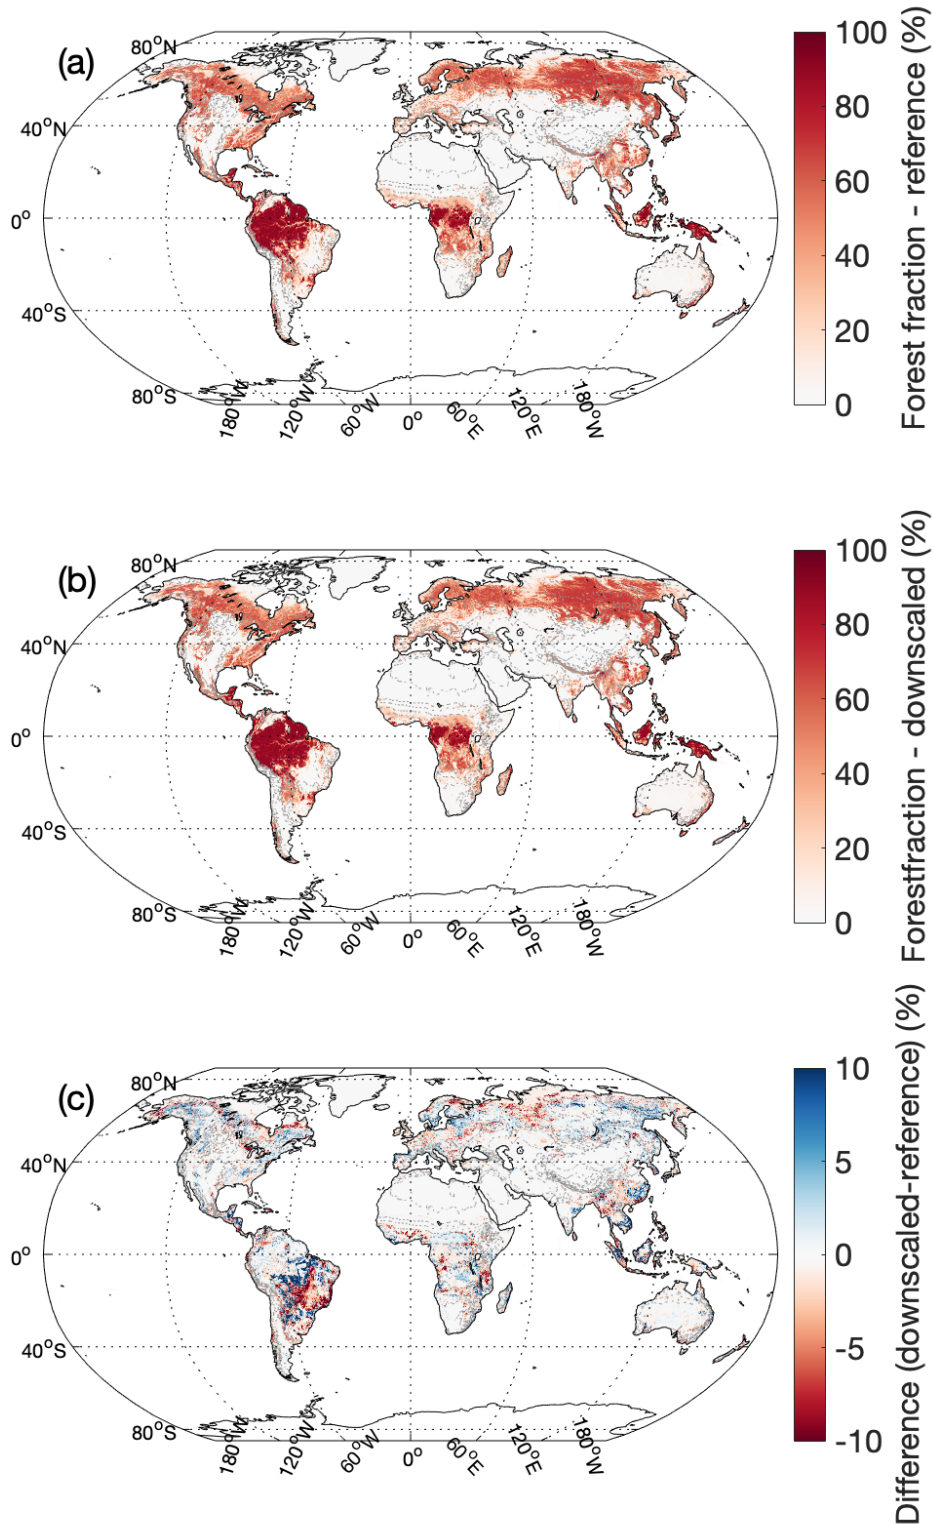

20 Figure S3. Spatial pattern of the observed and downscaled Shrub density (measured by  
21 percentage fraction of the grid cell), and their differences in 2015.

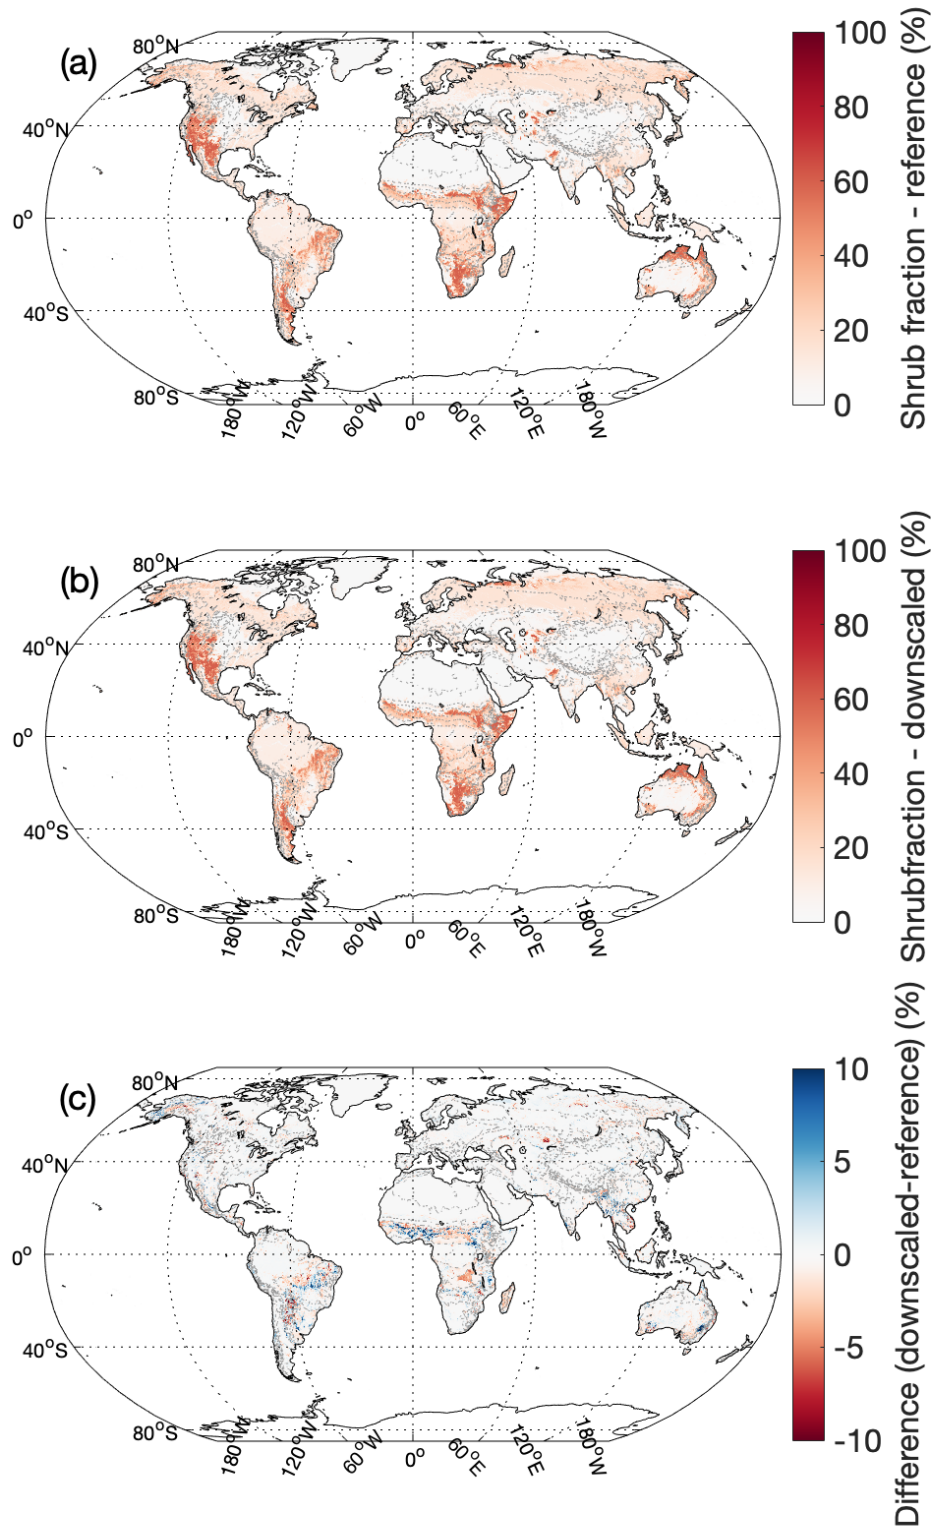

23 Figure S4. Spatial pattern of the observed and downscaled Grass density (measured by  
24 percentage fraction of the grid cell), and their differences in 2015.

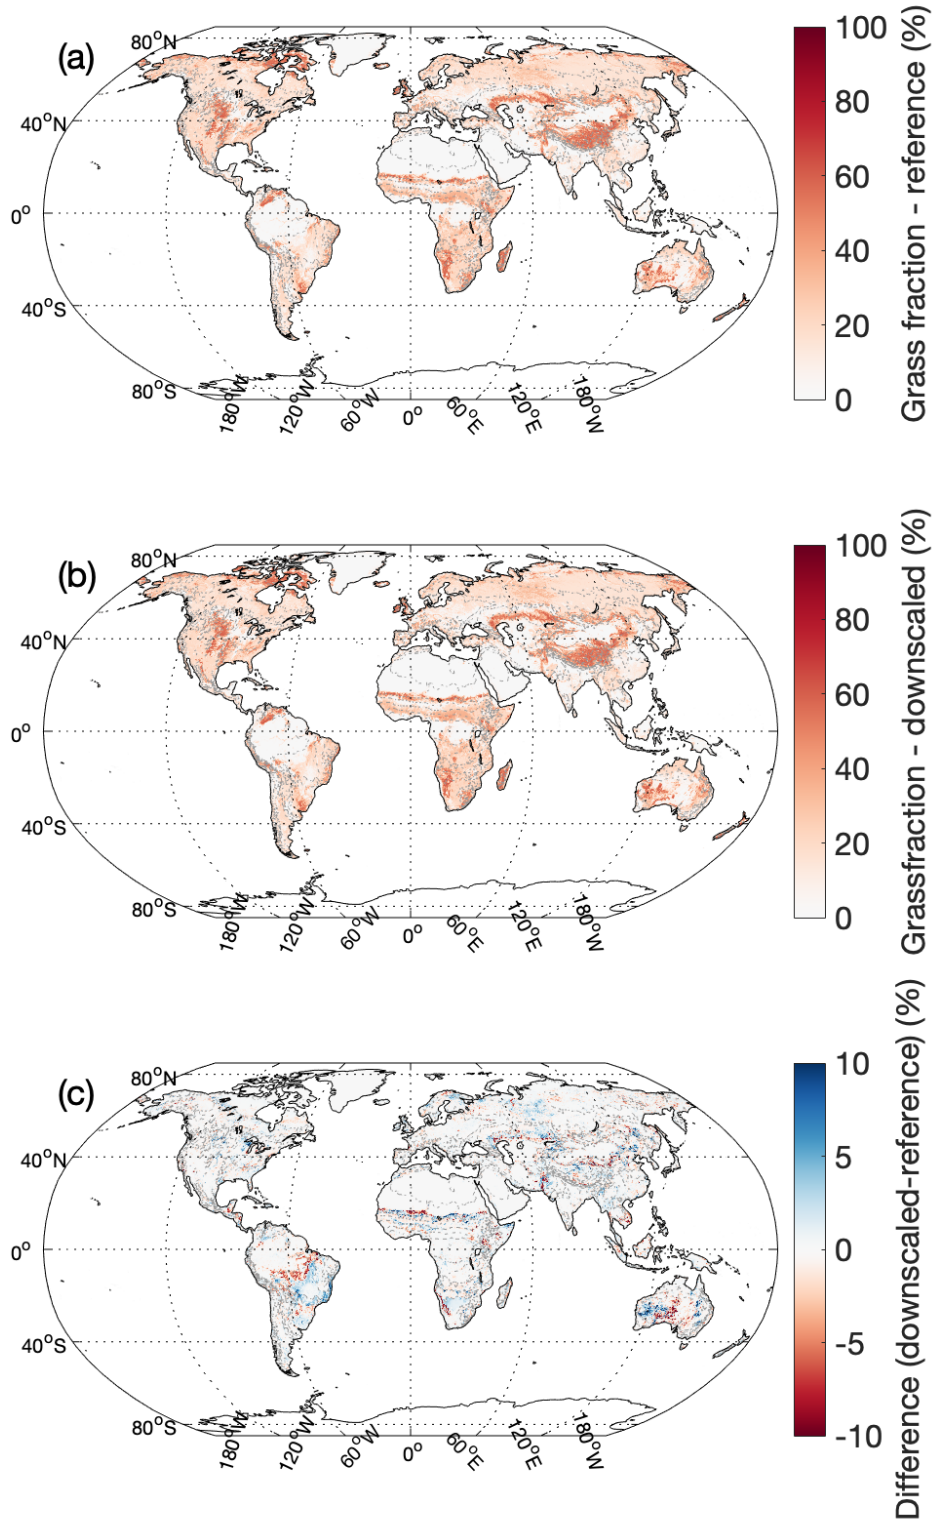

25

26 Figure S5. Spatial pattern of the observed and downscaled Urban density (measured by  
27 percentage fraction of the grid cell), and their differences in 2015.

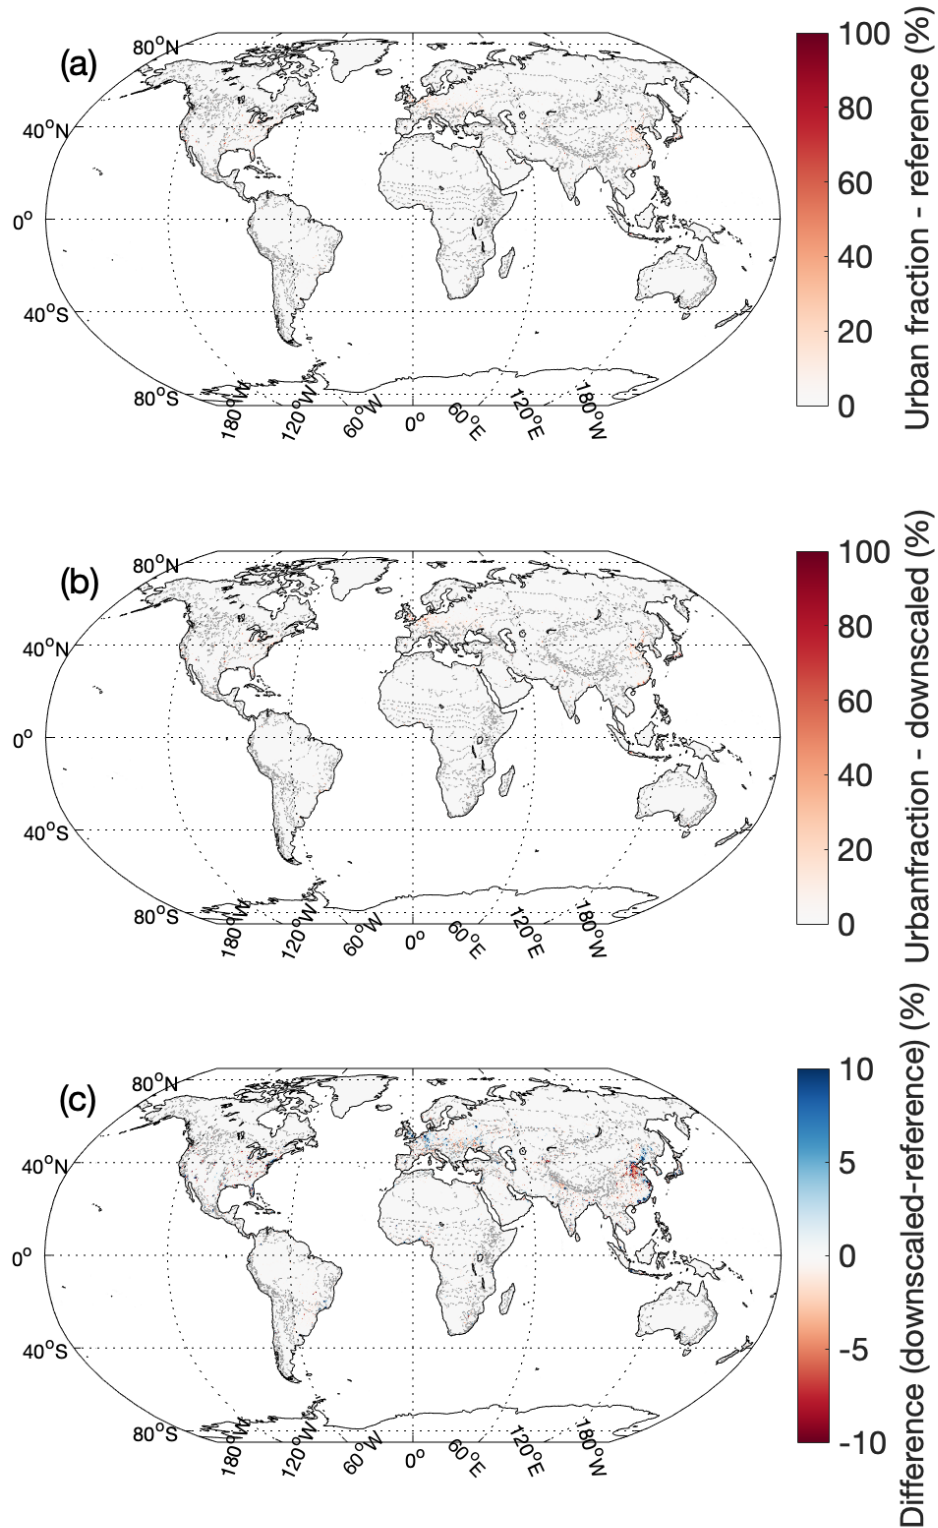

29 Figure S6. Spatial pattern of the observed and downscaled Snow density (measured by  
30 percentage fraction of the grid cell), and their differences in 2015.

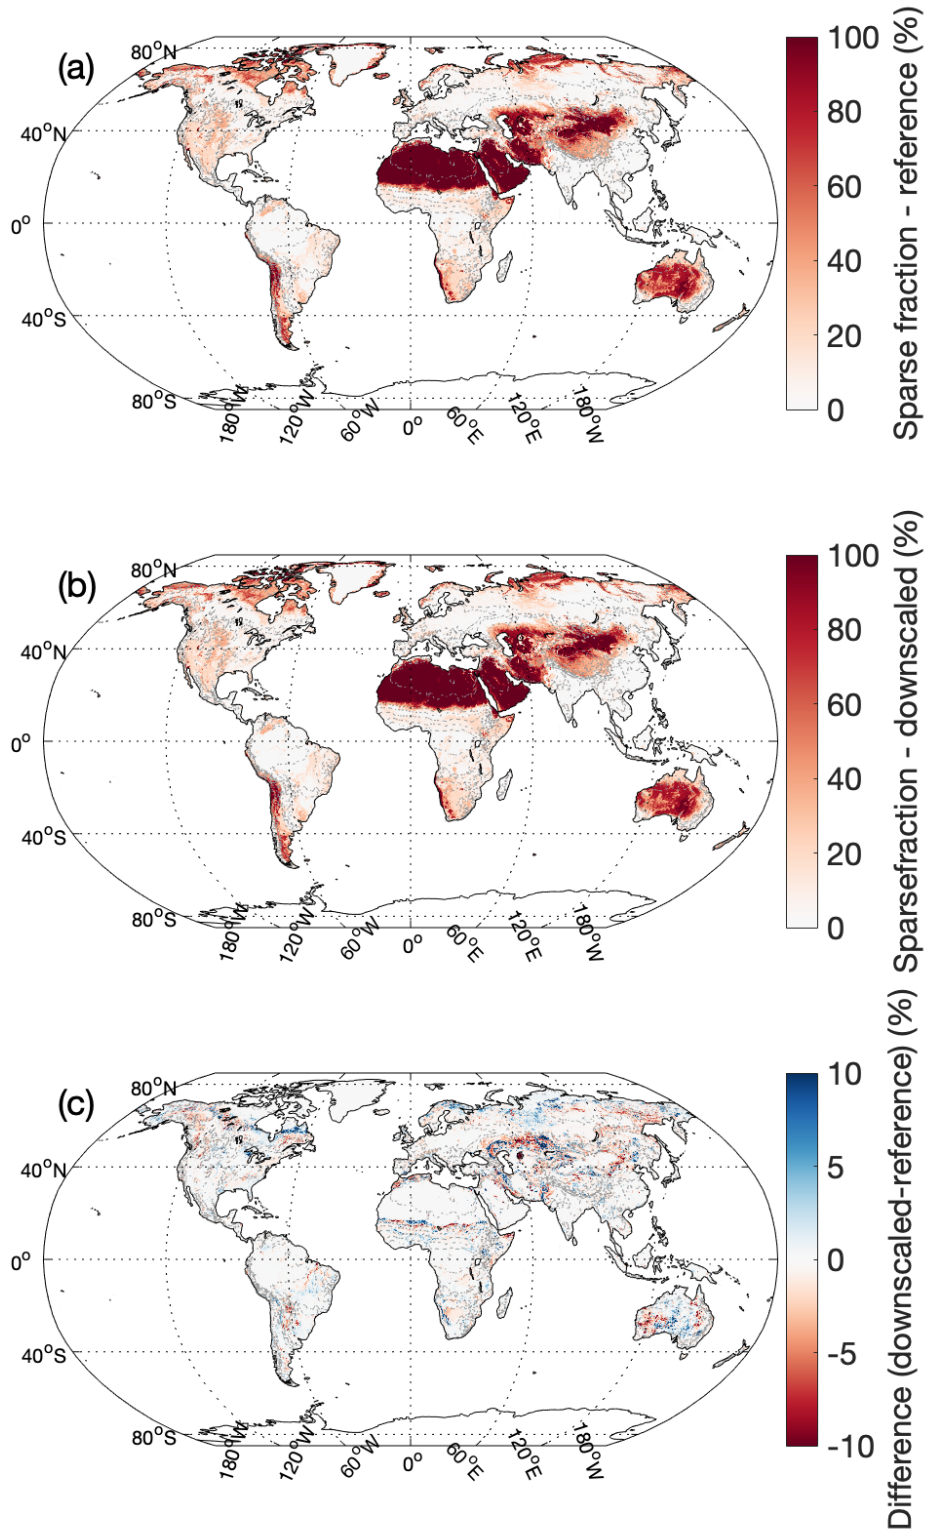



32 Figure S7. Mean and standard deviations ( $\sigma$ ) for the downscaled Final Land Type (FLT)  
 33 densities (measured by the percentage fraction of the grid cells) for each FLT and year, when  
 34 propagating the parameter uncertainties (indicated by the top 5% parameters) into the GCAM-  
 35 projected land use and land cover change downscaling in the 21<sup>st</sup> century. The color and the  
 36 height of the bars indicated the mean and standard deviation, respectively.

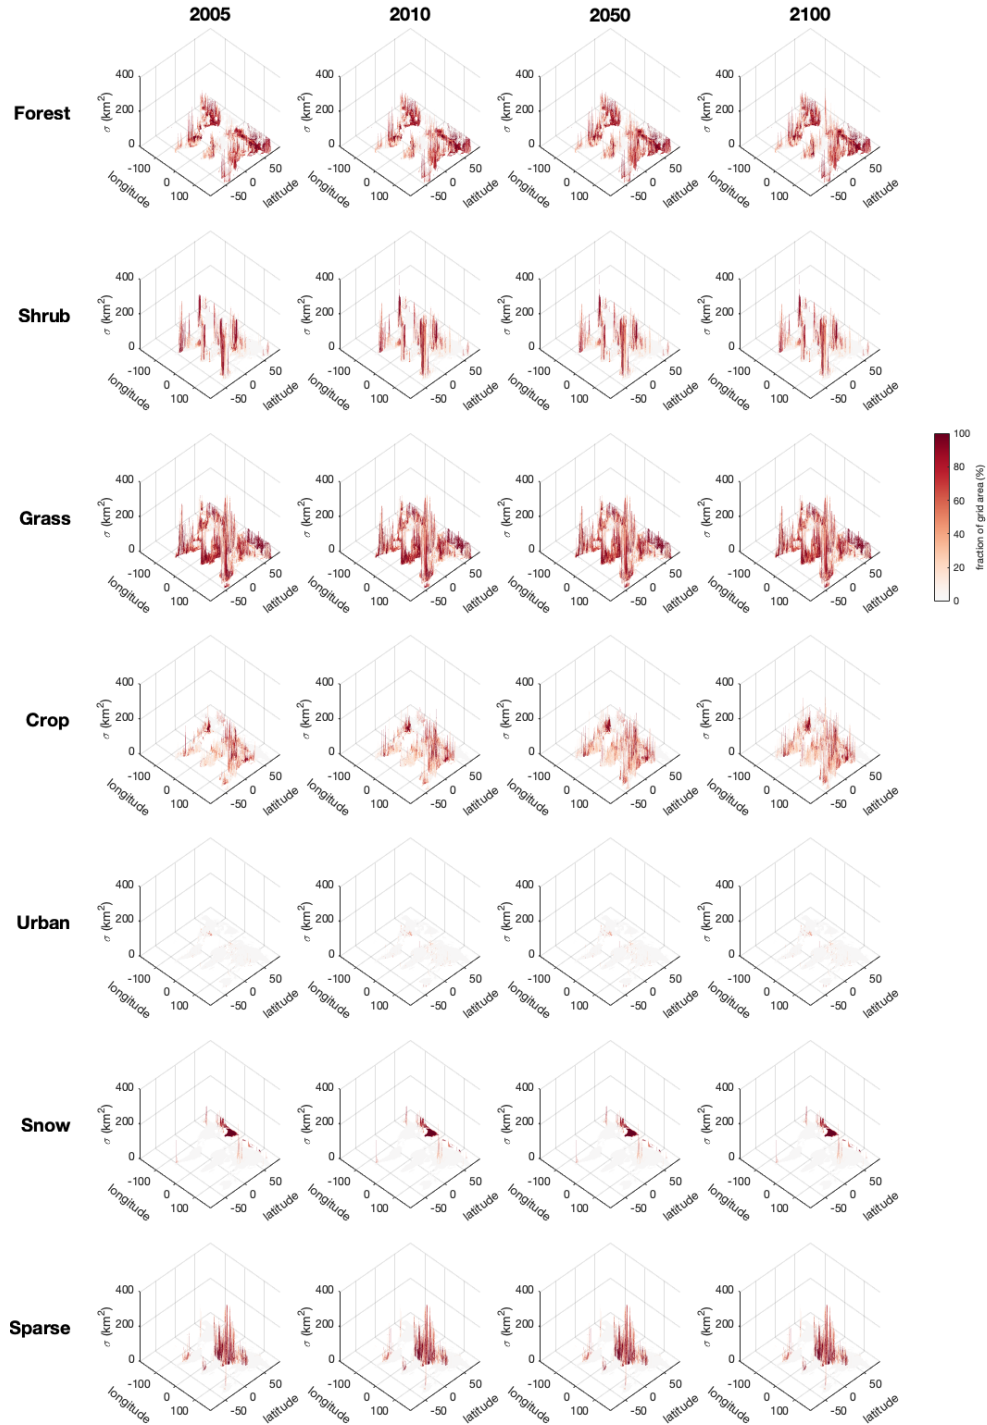

37  
38

39 Figure S8. Mean and standard deviations ( $\sigma$ ) for the downscaled Final Land Type (FLT)  
 40 densities (measured by the percentage fraction of the grid cells) for each FLT and year, when  
 41 propagating the parameter uncertainties (indicated by the top 10% parameters) into the GCAM-  
 42 projected land use and land cover change downscaling in the 21<sup>st</sup> century. The color and the  
 43 height of the bars indicated the mean and standard deviation, respectively.

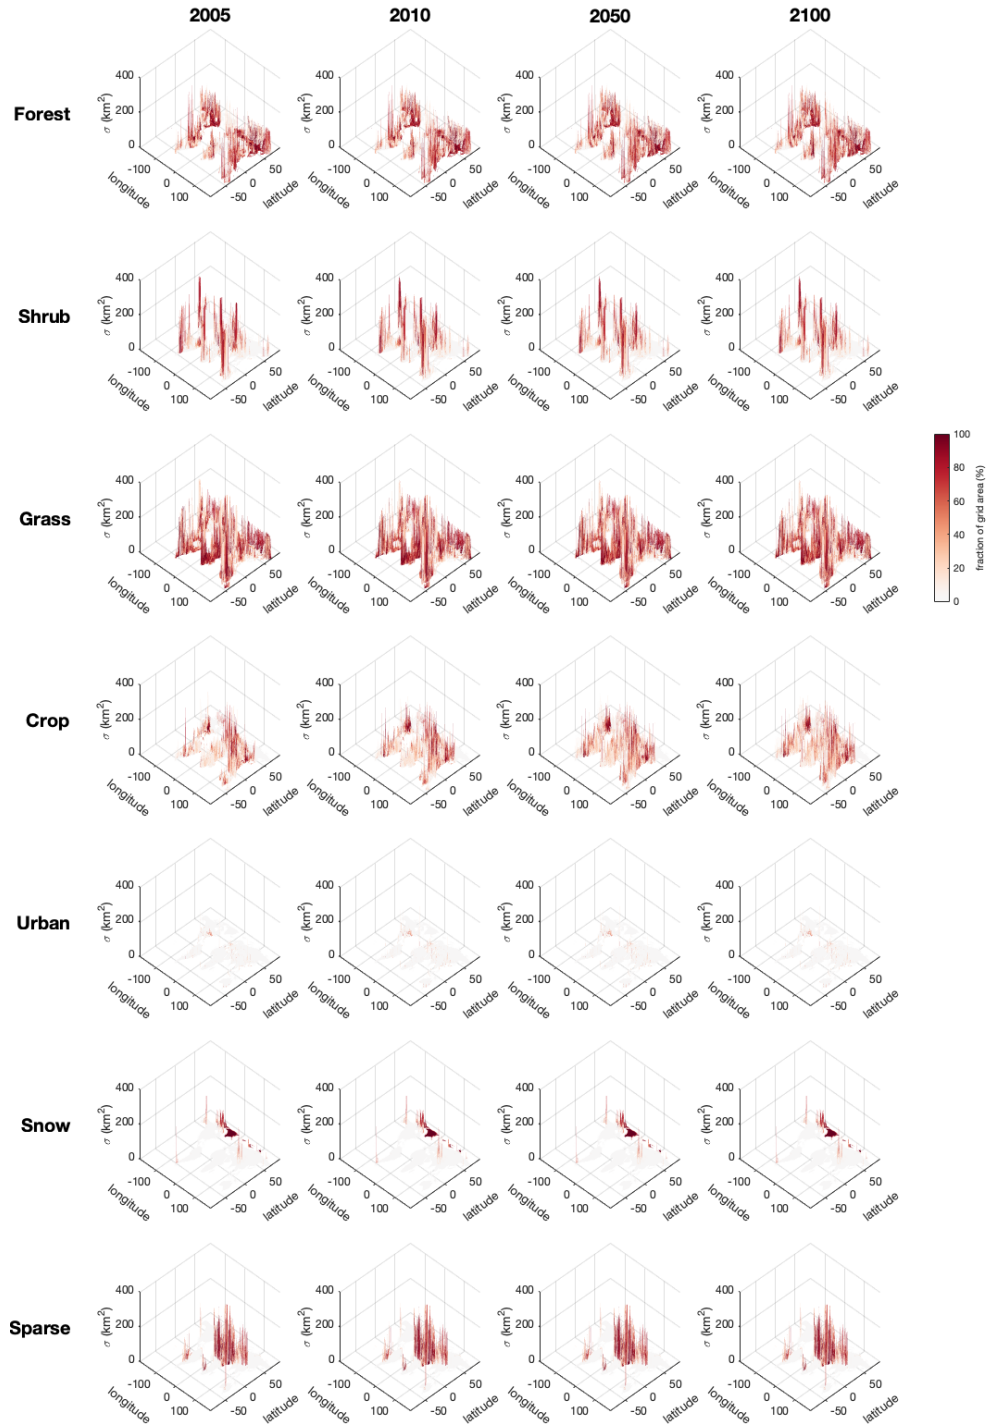

44  
45

46 Figure S9. Possibility distributions of the ‘best’ 5% parameters for India (a) and United States  
47 (b). The red lines show the optimal values for the two regions. Note that the values of  $D$  were  
48 divided by 100 for the purpose of illustration.

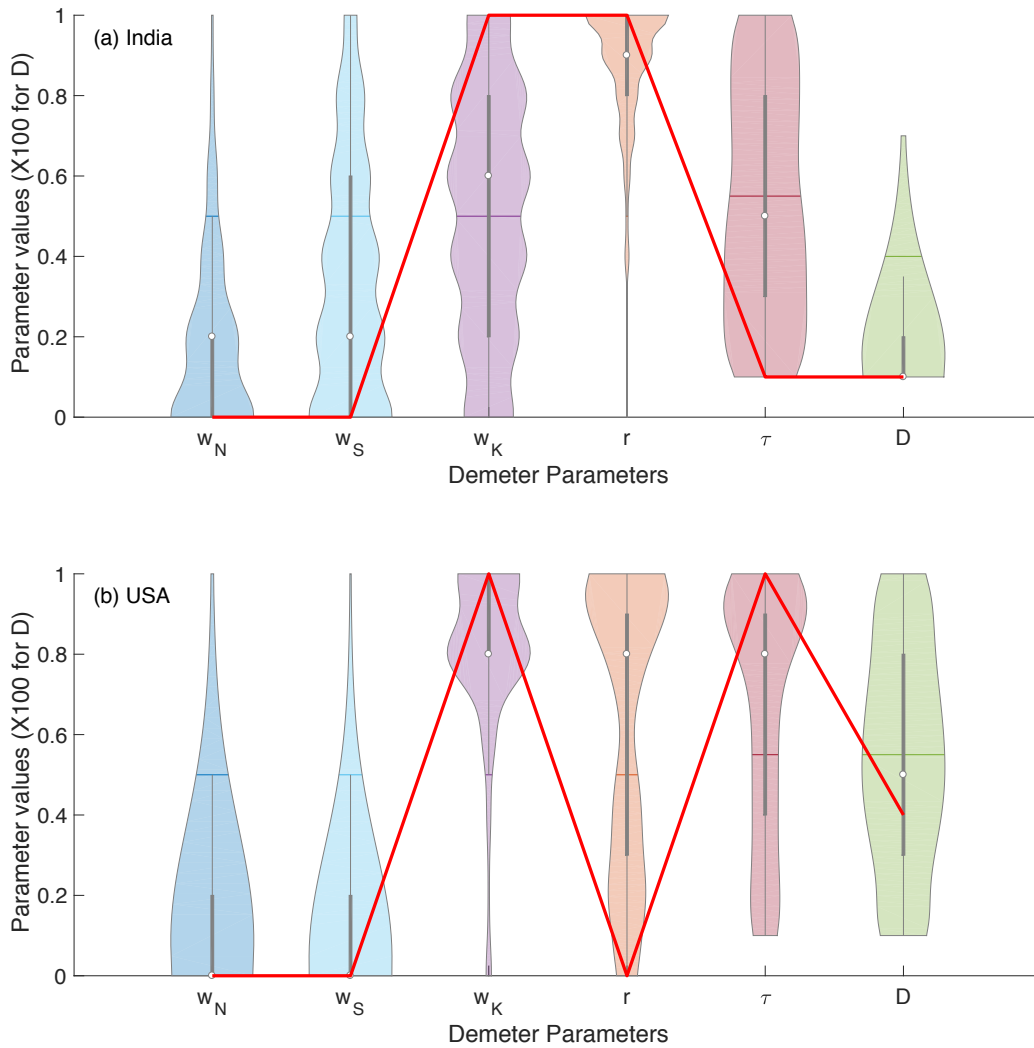

49  
50

51 Fig S10. Soil nutrient availability normalized between 0 to 1 from the Harmonized world soil  
52 database.

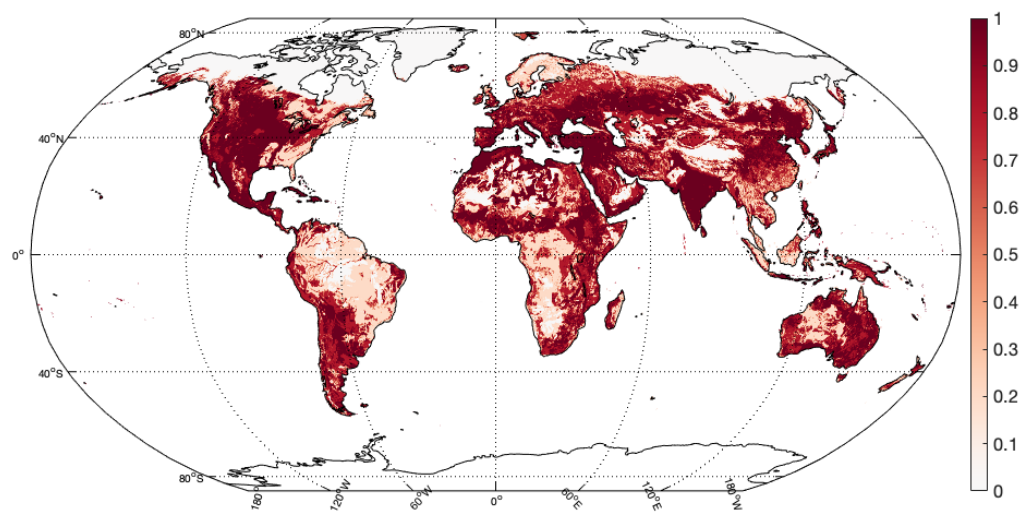

53
